Word Count: 3487

1  
2  
3  
4  
5  
6  
7  
8  
9  
10  
11  
12  
13  
14  
15  
16  
17  
18  
19  
20  
21  
22

**Estimated regional white matter hyperintensity burden, resting state functional connectivity, and cognitive functions in older adults**

Abhishek Jaywant PhD<sup>a,b</sup>, Katharine Dunlop PhD<sup>a,c</sup>, Lindsay W. Victoria PhD<sup>a,d</sup>, Lauren Oberlin PhD<sup>a,d</sup>, Charles J. Lynch PhD<sup>a,c</sup>, Matteo Respingo MD<sup>a,d</sup>, Amy Kuceyeski PhD<sup>e</sup>, Matthew Scult PhD<sup>a</sup>, Matthew Hoptman PhD<sup>f,g</sup>, Conor Liston MD PhD<sup>a,c</sup>, Michael W. O’Dell MD<sup>b</sup>, George S. Alexopoulos MD<sup>a,d</sup>, Roy H. Perlis MD<sup>h</sup>, and Faith M. Gunning PhD<sup>a,d</sup>

<sup>a</sup>Department of Psychiatry, Weill Cornell Medicine  
<sup>b</sup>Department of Rehabilitation Medicine, Weill Cornell Medicine  
<sup>c</sup>Feil Family Brain and Mind Research Institute, Weill Cornell Medicine  
<sup>d</sup>Weill Cornell Institute of Geriatric Psychiatry  
<sup>e</sup>Department of Radiology, Weill Cornell Medicine  
<sup>f</sup>Nathan Kline Institute for Psychiatric Research  
<sup>g</sup>Department of Psychiatry, New York University School of Medicine  
<sup>h</sup>Harvard Medical School/Massachusetts General Hospital

Corresponding author: Faith M. Gunning, Ph.D; fgd2002@med.cornell.edu  
525 E 68<sup>th</sup> St, New York, NY, 10065

Keywords: Cognitive Aging; Cerebrovascular Disease; Neuroimaging

23 **Abstract**

24 Objective: White matter hyperintensities (WMH) are linked to deficits in cognitive functioning,  
25 including cognitive control and memory; however, the structural and functional mechanisms are  
26 largely unknown. We investigated the relationship between estimated regional disruptions to  
27 white matter fiber tracts from WMH, resting state functional connectivity (RSFC), and cognitive  
28 functions in older adults. Design: Cross-sectional study. Setting: Community. Participants: Fifty-  
29 eight cognitively-healthy older adults. Measurements: Tasks of cognitive control and memory,  
30 structural MRI, and resting state fMRI. We estimated the disruption to white matter fiber tracts  
31 from WMH and its impact on gray matter regions in the cortical and subcortical frontoparietal  
32 network, default mode network, and ventral attention network by overlaying each subject's  
33 WMH mask on a normative tractogram dataset. We calculated RSFC between nodes in those  
34 same networks. Results: The interaction of estimated regional WMH burden and RSFC in  
35 cortico-striatal regions of the default mode network and frontoparietal network was associated  
36 with memory retrieval. Models predicting working memory, cognitive inhibition, and set-shifting  
37 were not significant. Conclusions: Findings highlight the role of circuit-level alterations at the  
38 structural and functional levels in resting state networks that are related to WMH and impact  
39 memory retrieval in older adults.

40

41 **MeSH Keywords:**

42 Cognitive Aging; Neuropsychology; Neuroimaging; Magnetic Resonance Imaging;

43 Cerebrovascular disease

## 44 **1. Objective**

45 Cerebrovascular disease is associated with mood disorders such as late-life depression<sup>1</sup>, and  
46 characterized by neurobiological abnormalities like white matter hyperintensities (WMH)<sup>2</sup>.  
47 WMH are linked to cognitive decline in older adults; a potential mechanism is their impact on  
48 structural connectivity<sup>3</sup>. WMH affect the strength and efficiency of white matter connections,  
49 which in turn are associated with slower processing speed<sup>4</sup> and declines in working memory,  
50 episodic memory, and cognitive flexibility<sup>5,6</sup>.

51  
52 Cognitive control—the ability to maintain task-relevant information in mind, flexibly shift set,  
53 and inhibit irrelevant information—is susceptible to cerebrovascular disease and WMH and their  
54 impact on structural connectivity. In older adults, cognitive control is linked to structural  
55 disconnection in frontal-subcortical circuits arising cerebrovascular disease<sup>7</sup>. These processes  
56 have important ramifications for older adults as they may increase risk for late-life mood  
57 disorders and treatment non-response<sup>8</sup> as well as loss of functional independence<sup>9</sup>. Memory  
58 dysfunction also occurs in the context of cerebrovascular disease and is associated with WMH-  
59 linked disruption in fiber tracts in frontal, temporal, and subcortical regions such as the anterior  
60 thalamic tract, the uncinate fasciculus, and the forceps minor<sup>10,11</sup>. Worse memory performance is  
61 also associated with depression in older adults<sup>12</sup>.

62  
63 Cognitive dysfunction in the setting of cerebrovascular disease may also depend on resting state  
64 functional connectivity (RSFC). In older adults with small vessel ischemic disease, worse  
65 cognitive control is associated with diminished RSFC in the frontoparietal network (FPN),  
66 default mode network (DMN), and in subcortical structures<sup>13,14</sup>. White matter lesions are also

67 associated with altered RSFC in the DMN<sup>15</sup> in mild cognitive impairment. These findings  
68 suggest that there are complex and dynamic interrelationships between structural and functional  
69 connectivity.

70  
71 Despite advances in neuroimaging techniques—and much research on the interrelationships  
72 among neuroimaging markers of cerebrovascular disease, structural anatomy and RSFC in small  
73 vessel disease and mild cognitive impairment—how these interactions contribute to changes in  
74 cognitive control and memory in healthy older adults is largely unknown. These interactions may  
75 inform the early mechanisms that may underlie cognitive decline in older adults, which can also  
76 shed light on circuit-level alterations that may predispose older adults to behavioral and mood  
77 disturbances. Understanding the relationship between structure, function, cognition, and vascular  
78 disease can also inform targeted and early approaches to promote and maintain cognitive health  
79 prior to the onset of late-life psychiatric disorders.

80  
81 The goal of this study was to investigate how estimated regional WMH burden and RSFC are  
82 related to cognitive control and memory in healthy older adults. We used the Network  
83 Modification Tool<sup>16</sup> to estimate the magnitude of disruption to white matter tracts from WMH in  
84 the FPN, DMN, and ventral attention network (VAN) and its impact on cognitive control and  
85 memory retrieval. We evaluated the relationship between estimated burden from WMH in these  
86 networks and RSFC in the same networks. We hypothesized that WMH-associated structural  
87 disruption and functional connectivity measures would interact in explaining cognitive  
88 performance.

89

## 90 **2. Methods**

91 *2.1. Participants.* Participants were 58 cognitively-healthy, independent, and community-  
92 dwelling older adults aged 60-84 (M=72.9 years, SD=6.02) who were enrolled in a larger trial  
93 investigating cognitive control and emotion regulation in late-life depression (ClinicalTrials.gov  
94 registration NCT01728194). All participants were English-speaking, non-depressed, and  
95 cognitively unimpaired (Mini Mental Status Examination  $\geq 26/30$ ). The absence of mild  
96 cognitive impairment or dementia was ensured through additional clinical assessment when  
97 indicated during the initial screen, including consensus clinical conferences led by board-  
98 certified geriatric psychiatrists. Because participants constituted a control group for a larger  
99 study, any participant in this sample who reported subjective memory complaints during an  
100 initial phone screen was screened out. Participants had no current or past history of major  
101 psychiatric illness or neurologic disorder. All participants were recruited through flyers and  
102 advertisements. All provided written informed consent, and the study was approved by the  
103 Institutional Review Boards of Weill Cornell Medicine and the Nathan Kline Institute. The  
104 participants constituted the control group for an analysis on structural connectivity and  
105 performance on the Trail Making Test in late-life depression that has been previously published  
106 by our group<sup>17</sup>. We extend our previous work by performing analyses of RSFC and relating it to  
107 estimated regional WMH burden and to cognitive measures in healthy older adults.

108

109 *2.2. Neuropsychological Assessment.* Trained research assistants administered the  
110 neuropsychological measures. To assess auditory attention and working memory, we  
111 administered the Digit Span subtest (total score of the forward and backward trials) of the  
112 Wechsler Adult Intelligence Scale-Fourth edition. The Stroop Color Word Test was used to

113 assess cognitive inhibition and susceptibility to interference from conflicting information. To  
114 assess attentional set-shifting we used the Trail Making Test (TMT) and calculated a ratio that  
115 isolates the shifting component while accounting for psychomotor processing speed, by dividing  
116 the time to completion on TMT-B by the time to completion on TMT-A<sup>18</sup>. We administered the  
117 Hopkins Verbal Learning Test-Revised and used the number of words recalled on the delayed  
118 recall trial to evaluate memory retrieval.

119

120 *2.3. Neuroimaging.* Structural and functional MRI scans were acquired on a 3T Siemens TiM  
121 Trio (Erlangen, Germany) scanner that was equipped with a 32-channel head coil at the Center  
122 for Biomedical Imaging and Neuromodulation of the Nathan Kline Institute for Psychiatric  
123 Research. Structural imaging included high-resolution whole brain images acquired using a 3D  
124 T1-weighted MPRAGE and T2-weighted FLAIR images. The acquisition parameters for  
125 MPRAGE were: TR=2500ms, TE=3.5ms, slice thickness=1mm, TI=1200ms, 192 axial slices,  
126 matrix=256 x 256 (voxel size=1mm isotropic), FOV=256mm, IPAT=2, flip angle=8 degrees.  
127 The acquisition parameters for the FLAIR sequence were TR=9000ms, TE=111ms, TI=2500ms,  
128 FOV=192 x 256 mm, matrix 192 x 256, slice thickness=2.5 mm, number of slices=64, IPAT=2,  
129 flip angle=120 degrees. The final FLAIR resolution (rectangular FOV/matrix) was 1x1 in plane.  
130 Functional neuroimaging was a turbo dual echoplanar image (EPI) sequence performed while  
131 participants were at rest. Acquisition parameters were repetition time=2500ms, echo time=30ms,  
132 flip angle=80 degrees, slice thickness=3mm, 38 axial slices, matrix=72 x 72, 3-mm isotropic,  
133 field of view=216mm, integrated parallel acquisition techniques factor=2. Resting-state image  
134 acquisition was conducted in a single run that was 6 minutes and 15 seconds in duration,

135 TR=2000ms. Participants were instructed to stay awake with eyes closed. Wakefulness was  
136 verified at the end of the scanning sequence by the technician.

137

138 [Insert Figure 1 about here]

139

140 Procedures to segment and estimate WMH burden and to estimate the impact of WMH on white  
141 matter fiber tracts have been previously described in detail<sup>17</sup>. Figure 1 illustrates the flow of  
142 neuroimaging analysis and statistical procedures. In brief, two raters performed a visual rating  
143 using operational criteria of the Age-Related White Matter Change scale<sup>19</sup>. Inter-rater reliability  
144 was strong (Intraclass Correlation Coefficient=.95). FSL<sup>20</sup> and the BIANCA program were  
145 subsequently used to segment WMH lesions and create WMH masks. WMH lesions smaller than  
146 3 voxels were removed. A visual check was performed on each individual WMH mask and  
147 minimal manual adjustments were made. Each final WMH mask was nonlinearly registered to  
148 MNI space and binarized.

149

150 Regional WMH burden was estimated using the Network Modification Tool, which has  
151 previously been used in aging populations<sup>21</sup>. Each WMH mask was overlaid on a normative  
152 sample of 420 healthy participants' tractograms from the Human Connectome Project. The  
153 program estimates the disruption to white matter fiber tracts and the effects on gray matter  
154 regions, incorporating the potential distal effects of white matter lesions on gray matter, by  
155 removing those tracts passing through a subject's WMH mask. This procedure was conducted  
156 using a combined atlas of the Yeo et al<sup>22</sup> 7-network cortical parcellation and the Choi et al<sup>23</sup> 7-  
157 network corresponding striatal parcellation. We were primarily interested in the FPN, DMN, and

158 VAN, the latter because it includes nodes of the salience network such as the dorsal anterior  
159 cingulate that are implicated in cognitive control. For our analysis, we evaluated the  
160 proportional loss (due to WMH mask overlap) in tracts cortically in the three networks, and  
161 between the cortex and striatum because of the known association between cortico-striatal  
162 connectivity and cognition. The proportional loss of tracts due to the WMH mask was calculated  
163 for each network (cortical and cortico-striatal separately) by dividing the number of streamlines  
164 in that subject's modified connectome by the mean number of streamlines in that region pair  
165 from the 420 healthy control tractogram set. Values range from 0 to 1, with higher values  
166 indicating greater estimated regional WMH burden.

167  
168 To extract corresponding RSFC values, each subject's EPI images were motion corrected using  
169 FSL's MCFLIRT, linearly registered to the anatomical T1 scan, and normalized to the MNI 152  
170 template. Additional preprocessing including slice-timing correction and spatial smoothing  
171 (6mm FWHM) was performed in AFNI<sup>24</sup>. Further removal of motion artifacts was performed  
172 using ICA-AROMA<sup>25</sup>. Motion was regressed out (demeaned and first derivative), artifacts were  
173 further removed using AFNI's *anaticor*, and the time-series was bandpass filtered. Time-series  
174 data were extracted using a previously published parcellation of 277 functional nodes<sup>26</sup> that  
175 includes the 264 nodes from the Power atlas<sup>27</sup> combined with 13 additional nodes in the caudate,  
176 amygdala, hippocampus, nucleus accumbens, subgenual anterior cingulate, locus coeruleus,  
177 ventral tegmental area, and the raphe nucleus. Each subject's 277x277 matrix was Fisher r-to-Z  
178 transformed. We subsequently extracted the modified Power atlas ROIs overlapping with the  
179 combined Yeo-Choi parcellation by calculating the Dice similarity coefficient for each network  
180 (FPN, VAN, DMN cortical and striatal). The 10 functional nodes in each network that had the



181 largest Dice coefficient  $> 0$  (i.e. had  $> 1$  voxel overlapping the structural ROI) were retained. We  
182 averaged the RSFC for the nodes within each network to extract a per-network RSFC score. Note  
183 that we elected not to use the same 7-network parcellation for RSFC because current  
184 recommendations suggest using functionally-based parcellations with much more fine-grained  
185 nodes for fMRI data<sup>28</sup>.

186  
187 *2.4. Statistical Analysis.* Statistical analyses were conducted using IBM SPSS Statistics version  
188 25 (IBM, Armonk, NY), Matlab, and RStudio. Analyses focused on the FPN, DMN, and VAN  
189 from the combined Yeo-Choi parcellation as described above. We computed Spearman rank-  
190 order correlations (because of the possibility of a non-linear relationship) to evaluate the  
191 relationship between estimated regional WMH burden and RSFC in each network, cortical and  
192 cortico-striatal separately. We used a conservative alpha of .01 given 36 correlations in the  
193 matrix, rather than a Bonferroni correction, to best balance the risk of type I and type II error and  
194 to ensure that we could detect correlations of modest strength. To further evaluate the robustness  
195 of these relationships, we compared model fit using the likelihood ratio test in predicting RSFC  
196 from regional WMH burden beyond the effect of age, education, and gender (see Supplemental  
197 Digital Content 1).

198  
199 We conducted a multivariate general linear model with  $\alpha=.05$  to determine how estimated  
200 regional WMH burden and functional connectivity were associated with cognitive performance.  
201 Outcome variables were Digit Span, Stroop Interference, TMT B/A ratio, and HVLT-R Delayed  
202 Recall. As predictors, we entered as main effects: (1) estimated regional WMH burden within the  
203 cortical FPN, DMN, and VAN; (2) cortico-striatal estimated regional WMH burden within the

204 FPN, DMN, and VAN; (3) cortico-cortical RSFC within the FPN, DMN, and VAN; and (4)  
205 cortico-striatal RSFC within the FPN, DMN, and VAN. We entered as interaction effects—  
206 which was the primary test of our hypothesis of structure-function interactions—the estimated  
207 regional WMH burden x RSFC for each network (i.e., cortico-cortical estimated regional WMH  
208 burden x RSFC in the FPN, cortico-striatal estimated regional WMH burden x RSFC in the FPN,  
209 cortico-cortical estimated regional WMH burden x RSFC in the DMN, cortico-striatal estimated  
210 regional WMH burden x RSFC in the DMN, cortico-cortical estimated regional WMH burden x  
211 RSFC in the VAN, cortico-striatal estimated regional WMH burden x RSFC in the VAN). All  
212 predictors were Z-normalized. Age, education, and gender were entered as covariates.

213

214 [Insert Table 1 and Figure 2 about here]

### 215 **3. Results**

216 *3.1. Demographic and clinical variables.* Table 1 displays the mean, SD, and ranges for age,  
217 education, and performance on the dementia screening assessments (Mini Mental Status  
218 Examination) and neuropsychological outcome measures for our sample. The ratio of  
219 male:female participants is also provided. Figure 2 shows the WMH distribution in the sample.  
220

221 *3.2. Correlations between estimated regional WMH burden and RSFC.* Table 2 shows the  
222 correlations between estimated regional WMH burden and RSFC for the FPN, VAN, and DMN,  
223 both cortically and between the cortex and striatum. Six participants were excluded from the  
224 correlation analyses and the multivariate general linear model (below) due to missing data,  
225 resulting in a final analyzed sample of N=52. There were significant negative correlations  
226 ( $p < .01$ ) between RSFC in the cortical DMN and estimated regional WMH burden in the cortico-

227 cortical FPN and cortico-striatal FPN. There were significant negative correlations between  
228 RSFC in the cortico-cortical VAN and estimated regional WMH burden in the cortico-cortical  
229 VAN. Of these correlations, only the relationship between estimated regional WMH burden in  
230 the cortico-striatal FPN and RSFC in the cortico-cortical DMN improved model fit beyond using  
231 age, education, and gender to predict RSFC (Supplemental Digital Content 1).

232

233 [Insert Table 2 about here]

234

235 *3.3. Associations between estimated regional WMH burden, RSFC, and cognition.* Results of the  
236 omnibus test of significance for the multivariate general linear model indicated a significant  
237 effect on HVLT-R Delayed Recall,  $F(24)=3.43$ ,  $p=.001$ , adjusted  $R^2=.50$ . The omnibus test was  
238 not significant for Stroop Interference,  $F(24)=.90$ ,  $p=.59$ , adjusted  $R^2=-.04$ ; Digit Span,  
239  $F(24)=1.37$ ,  $p=.21$ , adjusted  $R^2=.13$ ; or TMT B/A,  $F(24)=.22$ ,  $p=1.0$ , adjusted  $R^2=-.47$ ). We did  
240 not evaluate the significance of individual predictors for these non-significant outcomes.

241

242 For the outcome variable of HVLT-R Delayed Recall, our primary analysis was the interaction  
243 between regional WMH burden and RSFC. There were significant interaction effects of  
244 estimated regional WMH burden x RSFC in the cortico-striatal FPN ( $\beta=-.89$ ,  $SE=.31$ ,  $t=-2.89$ ,  
245  $p=.007$ ), cortico-striatal DMN ( $\beta=.68$ ,  $SE=.31$ ,  $t=2.18$ ,  $p=.04$ ), and cortico-cortical DMN  
246 ( $\beta=1.67$ ,  $SE=.79$ ,  $t=2.11$ ,  $p=.04$ ). For the interaction between estimated regional WMH burden  
247 and RSFC in the cortical DMN, there was a negative relationship between RSFC and memory  
248 retrieval, although the slope of that relationship was weaker in individuals with low estimated  
249 regional WMH burden (Figure 3a; Figure 4). For the interaction between estimated regional

250 WMH burden and RSFC in the cortico-striatal DMN, higher RSFC in the DMN was associated  
251 with better memory retrieval for individuals with high estimated regional WMH burden; lower  
252 RSFC was associated with better memory retrieval for those with low estimated regional WMH  
253 burden; and there was minimal relationship between RSFC and memory retrieval for those with  
254 moderate estimated regional WMH burden (Figure 3b; Figure 4). For those with high estimated  
255 regional WMH burden in the cortico-striatal FPN, lower RSFC was associated with better  
256 memory retrieval, while the opposite was true of those with low and moderate estimated regional  
257 WMH burden (Figure 3c; Figure 4). Though not of primary interest in evaluating our hypotheses,  
258 significant main effects included education ( $\beta=.30$ ,  $SE=.12$ ,  $t=2.45$ ,  $p=.02$ ), RSFC in the cortical  
259 FPN ( $\beta=-2.68$ ,  $SE=1.06$ ,  $t=-2.53$ ,  $p=.02$ ), and RSFC in the cortico-striatal FPN ( $\beta=.76$ ,  $SE=.34$ ,  
260  $t=2.20$ ,  $p=.04$ ).

261

262 [Insert Figures 3 and 4 about here]

263

#### 264 **4. Discussion**

265 We found that in cognitively-healthy older adults, (1) there are modest associations between  
266 estimated regional WMH burden and RSFC within and across networks, with WMH burden in  
267 the FPN and RSFC in the DMN having a relatively robust association; and (2) the relationship  
268 between estimated regional WMH burden and resting state functional connectivity predicts  
269 memory retrieval, but not cognitive inhibition, attention/working memory, or set-shifting.  
270 Specifically, estimated regional WMH burden interacts with RSFC in cortico-cortical and  
271 cortico-striatal regions of the FPN and DMN, to predict memory retrieval. These findings extend  
272 prior work relating white matter lesions and RSFC in small vessel disease and mild cognitive

273 impairment. Our findings indicate that alterations in structural and functional circuitry from  
274 WMH are both associated with select aspects of cognitive functioning in healthy older adults.  
275  
276 We found that structure-function relationships may differ by network in cognitively-healthy  
277 older adults without a diagnosed cerebrovascular disorder. These findings suggest that greater  
278 estimated regional WMH burden is associated with an age-related decline in RSFC within and  
279 between networks, though the magnitude of the correlation coefficients were small-moderate.  
280 We found a relatively robust negative association between cortico-striatal estimated regional  
281 WMH burden in the FPN and RSFC in the cortico-cortical DMN. This finding is consistent with  
282 the known dense connections that exist between networks<sup>29</sup>. It is also consistent with  
283 observations that RSFC decreases in functional networks, including the DMN, in normal aging<sup>30</sup>,  
284 small vessel ischemic disease<sup>13</sup>, and stroke<sup>31</sup>. Although RSFC in the FPN was not associated  
285 with structural disruption from WMH, there is suggestion that structure-function coupling within  
286 this network may weaken in older adults<sup>32</sup>.  
287  
288 Our examination of estimated regional WMH burden replicates prior studies demonstrating a  
289 relationship between disruptions in white matter pathways and cognitive decline in older  
290 adults<sup>4,6</sup>, and the effects of WMH on distal white matter tracts and cognition<sup>33</sup>, and extends them  
291 to identify interactions with RSFC. We found that the relationship between estimated regional  
292 WMH burden and RSFC in the FPN and DMN predicted memory retrieval. This finding is  
293 consistent with the known role of the DMN in episodic memory<sup>34</sup> and the importance of the role  
294 of executive control processes subserved by the FPN in facilitating effortful search and retrieval  
295 from long-term memory<sup>35</sup>.

296  
297 The interactions observed in the DMN and FPN and memory retrieval indicates that in  
298 individuals with high estimated regional WMH burden in the cortico-striatal DMN, RSFC was  
299 positively associated with memory retrieval, while RSFC was negatively associated with  
300 memory retrieval in those with low estimated regional WMH burden. This pattern suggests that  
301 functional connectivity in the DMN may support behavioral performance in a “compensatory”  
302 manner in the face of increasing WMH-related structural disruption. Increases in functional  
303 connectivity may be protective against the negative effects of white matter lesions<sup>36</sup>. Our result is  
304 also similar to the finding that greater functional connectivity between the medial prefrontal  
305 cortex and inferior parietal cortex is associated with better episodic memory in older adults with  
306 greater gray matter atrophy<sup>37</sup>.

307  
308 Consistent with the known role of functional activation in the FPN during memory retrieval  
309 processes, increasing RSFC in the cortico-striatal FPN was positively associated with better  
310 memory retrieval in those with low and moderate levels of estimated regional WMH burden.  
311 However, at high levels of WMH burden, increasing RSFC in the FPN was associated with  
312 worse memory performance. This pattern may represent an unsuccessful or maladaptive  
313 compensatory response, reflected in an overreliance on the FPN. A similar dissociation between  
314 functional activity in the DMN and FPN at high levels of WMH-related structural disruption has  
315 been observed recently in multiple sclerosis in which cognitive deficits were linked to decreased  
316 DMN activity and increased FPN activity<sup>38</sup>. That cortico-striatal connectivity in the FPN and  
317 DMN was implicated may be because the WMH in our sample were frequently in periventricular  
318 regions.

319

320 Contrary to our initial hypothesis, we did not find significant associations with cognitive control.

321 The lack of association with cognitive control may be related to the assessment measures

322 themselves, as the neuropsychological measures we used may not have been sensitive or

323 comprehensive enough to detect subtle age-related decline in cognitive control functions. In

324 addition, subjective cognitive decline may be a marker of subtle deficits prior to objectively

325 observable cognitive impairment, thus, it is possible that estimated regional WMH burden and

326 RSFC may have predicted subjective complaints in cognitive control functions.

327

328 Limitations include the length of the resting state scan (6 minutes and 15 seconds), which is of

329 short duration compared to current standards. Given that reliability tends to increase with longer

330 durations replication of our RSFC findings with longer scan times is warranted. Our age range

331 was relatively restricted and future studies would benefit from including a broader range of ages

332 and comparing our findings to middle-aged and old-old adults. The normative tractograms used

333 by the Network Modification Tool are drawn from relatively young adults in the Human

334 Connectome Project and the discrepancy in age with our sample may have induced additional

335 error. However, this weakness may be partially mitigated by studies demonstrating that structural

336 disconnection maps were similar in younger adults versus older adults<sup>39</sup> and a strong correlation

337 ( $r=.87$ ) between disconnection maps that use age-matched reference tractograms and young adult

338 tractograms from the Human Connectome Project<sup>40</sup>. Our measure of estimating regional burden

339 from WMH takes an “all or none” approach (presence or absence of a streamline) which likely

340 oversimplifies the process of white matter injury and reorganization; nonetheless, this approach

341 can be useful in clinical populations in determining inferred disconnection in a cost-efficient  
342 manner when diffusion MRI is not feasible.

343

#### 344 *4.1. Conclusion*

345 We demonstrate that in cognitively-healthy older adults, estimated regional WMH burden is  
346 associated with a decline in resting state functional connectivity in the DMN, and that the  
347 interaction between resting state functional connectivity and estimated regional WMH burden in  
348 cortical and subcortical regions of the frontoparietal and default mode networks are both  
349 associated with memory retrieval. Our findings highlight the role that alterations in the structural  
350 and functional connectome both play in older adults in the setting of cerebrovascular processes.  
351 Early, targeted approaches directed towards the FPN and DMN may promote and maintain  
352 cognitive health in older adults, prior to the onset of mild cognitive impairment or late-life mood  
353 disorders.



354 **Acknowledgements**

355 We thank Cristina Pollari for assistance with database management, Naib Chowdhury for help  
356 acquiring behavioral data, Keith Jamison for assistance in implementing the Network  
357 Modification Tool, and Elvisha Dhamala for help in creating the figures. We are grateful to the  
358 staff of the Center for Biomedical Neuroimaging and Brain Modulation at the Nathan Kline  
359 Institute for Psychiatric Research for assistance with neuroimaging data collection. This work  
360 was supported by the National Institute of Mental Health (NIMH) grants R01 MH097735  
361 (Gunning) and T32 MH019132 (Alexopoulos). The sponsor did not have any role in the study  
362 design, the acquisition, analysis, or interpretation of the data, the writing of the report, or the  
363 decision to submit the manuscript for publication.

364

365 **Author Contributions**

366 AJ: conceptualization, methodology, formal analysis, data curation, writing, and visualization.  
367 KD: conceptualization, methodology, analysis validation, and writing. LWV: conceptualization,  
368 methodology, data curation, writing, and visualization. LO: conceptualization, writing; CJL:  
369 conceptualization, writing; MR: methodology, conceptualization, software implementation; data  
370 curation, formal analysis; AK: methodology, software development, conceptualization, writing;  
371 MS: writing; MJH: writing; CL: supervision; MWO: writing; GSA: writing, funding acquisition;  
372 RHP: formal analysis, writing; FMG: conceptualization, methodology, writing, supervision,  
373 funding acquisition.

374

375

376

377 **Financial Disclosures/Conflicts of Interest**

378 GSA has participated in the advisory boards of Janssen and Otsuka, and has served on the  
379 speakers bureaus of Allergan, Otsuka, Takeda, and Lundbeck. RHP receives consulting fees  
380 from Genomind, RID Ventures, Outermost Therapeutics, Psy Therapeutics, Burrage Capital, and  
381 Takeda. He is a paid associate editor for the JAMA Network. AJ, KD, LWV, LO, CJL, AK, MR,  
382 MJH, MS, CL, MWO, and FMG report no financial disclosures.

383 **References**

384

- 385 1. Alexopoulos GS. Depression and Cerebrovascular Disease: What is to be Done? *Am J*  
386 *Geriatr Psychiatry*. 2017;25(2):129-130. doi:10.1016/j.jagp.2016.11.013
- 387 2. Moroni F, Ammirati E, Rocca MA, Filippi M, Magnoni M, Camici PG. Cardiovascular  
388 disease and brain health: Focus on white matter hyperintensities. *IJC Hear Vasc*.  
389 2018;19:63-69. doi:10.1016/j.ijcha.2018.04.006
- 390 3. Langen CD, Cremers LGM, de Groot M, et al. Disconnection due to white matter  
391 hyperintensities is associated with lower cognitive scores. *Neuroimage*. 2018;183:745-  
392 756. doi:10.1016/j.neuroimage.2018.08.037
- 393 4. Tuladhar AM, van Dijk E, Zwiers MP, et al. Structural Network Connectivity and  
394 Cognition in Cerebral Small Vessel Disease. *Hum Brain Mapp*. 2016;37:300-310.  
395 doi:10.1002/hbm.23032
- 396 5. Gunning-Dixon FM, Raz N. Neuroanatomical correlates of selected executive functions in  
397 middle-aged and older adults: a prospective MRI study. *Neuropsychologia*. 2003;41:1929-  
398 1941. doi:10.1016/S0028-3932(03)00129-5
- 399 6. Wiseman SJ, Booth T, Ritchie SJ, et al. Cognitive Abilities, Brain White Matter  
400 Hyperintensity Volume , and Structural Network Connectivity in Older Age. *Hum Brain*  
401 *Mapp*. 2018;39:622-632. doi:10.1002/hbm.23857
- 402 7. Klostermann EC, Braskie MN, Landau SM, O'Neil JP, Jagust WJ. Dopamine and  
403 frontostriatal networks in cognitive aging. *Neurobiol Aging*. Published online  
404 2012:623.e15-623.e24. doi:10.1016/j.neurobiolaging.2011.03.002
- 405 8. Sneed JR, Culang-Reinlieb ME, Brickman AM, et al. MRI signal hyperintensities and

- 406 failure to remit following antidepressant treatment. *J Affect Disord.* 2011;135:315-320.  
407 doi:10.1016/j.jad.2011.06.052
- 408 9. Cahn-Weiner DA, Boyle PA, Malloy PF. Tests of executive function predict instrumental  
409 activities of daily living in community-dwelling older individuals. *Appl Neuropsychol.*  
410 2002;9(3):187-191. doi:10.1207/S15324826AN0903\_8
- 411 10. Biesbroek JM, Weaver NA, Hilal S, et al. Impact of Strategically Located White Matter  
412 Hyperintensities on Cognition in Memory Clinic Patients with Small Vessel Disease.  
413 *PLoS One.* 2016;11(11):1-17. doi:10.1371/journal.pone.0166261
- 414 11. Rizvi B, Lao PJ, Colón J, et al. Tract-defined regional white matter hyperintensities and  
415 memory. *NeuroImage Clin.* 2020;25:102143. doi:10.1016/j.nicl.2019.102143
- 416 12. Brailean A, Aartsen MJ, Muniz-Terrera G, et al. Longitudinal associations between late-  
417 life depression dimensions and cognitive functioning: A cross-domain latent growth curve  
418 analysis. *Psychol Med.* 2017;47(4):690-702. doi:10.1017/S003329171600297X
- 419 13. Schaefer A, Quinque EM, Kipping JA, et al. Early small vessel disease affects  
420 frontoparietal and cerebellar hubs in close correlation with clinical symptoms — a resting-  
421 state fMRI study. *J Cereb Blood Flow Metab.* 2014;34:1091-1095.  
422 doi:10.1038/jcbfm.2014.70
- 423 14. Yi L, Liang X, Liu D, et al. Disrupted Topological Organization of Resting-State  
424 Functional Brain Network in Subcortical Vascular Mild Cognitive Impairment. *CNS*  
425 *Neurosci Ther.* 2015;21:846-854. doi:10.1111/cns.12424
- 426 15. Luo X, Jiaerken Y, Huang P, et al. Alteration of regional homogeneity and white matter  
427 hyperintensities in amnesic mild cognitive impairment subtypes are related to cognition  
428 and CSF biomarkers. *Brain Imaging Behav.* 2018;12(1):188-200. doi:10.1007/s11682-

- 429 017-9680-4
- 430 16. Kuceyeski A, Maruta J, Relkin N, Raj A. The Network Modification (NeMo) Tool:  
431 Elucidating the Effect of White Matter Integrity Changes on Cortical and Subcortical  
432 Structural Connectivity. *Brain Connect.* 2013;3(5):451-463. doi:10.1089/brain.2013.0147
- 433 17. Respino M, Jaywant A, Kuceyeski A, et al. The impact of white matter hyperintensities on  
434 the structural connectome in late-life depression: Relationship to executive functions.  
435 *NeuroImage Clin.* Published online 2019. doi:10.1016/j.nicl.2019.101852
- 436 18. Salthouse TA. What cognitive abilities are involved in trail-making performance?  
437 *Intelligence.* 2011;39(4):222-232. doi:10.1016/j.intell.2011.03.001.What
- 438 19. Wahlund LO, Barkhof F, Fazekas F, et al. A new rating scale for age-related white matter  
439 changes applicable to MRI and CT. *Stroke.* 2001;32(6):1318-1322.  
440 doi:10.1161/01.STR.32.6.1318
- 441 20. Jenkinson M, Beckmann CF, Behrens TEJ, Woolrich MW, Smith SM. FSL. *Neuroimage.*  
442 2012;62(2):782-790. doi:10.1016/j.neuroimage.2011.09.015
- 443 21. Kuceyeski A, Navi BB, Kamel H, et al. Exploring the brain's structural connectome: A  
444 quantitative stroke lesion-dysfunction mapping study. *Hum Brain Mapp.* 2015;36:2147-  
445 2160. doi:10.1002/hbm.22761
- 446 22. Thomas Yeo BT, Krienen FM, Sepulcre J, et al. The organization of the human cerebral  
447 cortex estimated by intrinsic functional connectivity. *J Neurophysiol.* 2011;106(3):1125-  
448 1165. doi:10.1152/jn.00338.2011
- 449 23. Choi EY, Thomas Yeo BT, Buckner RL. The organization of the human striatum  
450 estimated by intrinsic functional connectivity. *J Neurophysiol.* 2012;108(8):2242-2263.  
451 doi:10.1152/jn.00270.2012

- 452 24. Cox R. AFNI: Software for analysis and visualization of functional magnetic resonance  
453 neuroimages. *Comput Biomed Res.* 1996;29:162-173.
- 454 25. Pruim RHR, Mennes M, van Rooij D, Llera A, Buitelaar JK, Beckmann CF. ICA-  
455 AROMA: A robust ICA-based strategy for removing motion artifacts from fMRI data.  
456 *Neuroimage.* 2015;112:267-277. doi:10.1016/j.neuroimage.2015.02.064
- 457 26. Drysdale AT, Grosenick L, Downar J, et al. Resting-state connectivity biomarkers define  
458 neurophysiological subtypes of depression. *Nat Med.* 2017;23(1):28-38.  
459 doi:10.1038/nm.4246
- 460 27. Power JD, Cohen AL, Nelson SM, et al. Functional Network Organization of the Human  
461 Brain. *Neuron.* 2011;72(4):665-678. doi:10.1016/j.neuron.2011.09.006
- 462 28. Arslan S, Ktena SI, Makropoulos A, Robinson EC, Rueckert D, Parisot S. Human brain  
463 mapping: A systematic comparison of parcellation methods for the human cerebral cortex.  
464 *Neuroimage.* 2018;170:5-30. doi:10.1016/j.neuroimage.2017.04.014
- 465 29. Leech R, Sharp DJ. The role of the posterior cingulate cortex in cognition and disease.  
466 *Brain.* 2014;137:12-32. doi:10.1093/brain/awt162
- 467 30. Mayda ABV, Westphal A, Carter CS, Decarli C. Late life cognitive control deficits are  
468 accentuated by white matter disease burden. *Brain.* 2011;134(6):1673-1683.  
469 doi:10.1093/brain/awr065
- 470 31. Siegel JS, Seitzman BA, Ramsey LE, et al. Re-emergence of modular brain networks in  
471 stroke recovery. *Cortex.* 2018;101:44-59. doi:10.1016/j.cortex.2017.12.019
- 472 32. Zimmermann J, Ritter P, Shen K, Rothmeier S, Schirner M, McIntosh AR. Structural  
473 Architecture Supports Functional Organization in the Human Aging Brain at a  
474 Regionwise and Network Level. *Hum Brain Mapp.* 2016;2661:2645-2661.

- 475           doi:10.1002/hbm.23200
- 476   33.   Liu Y, Xia Y, Wang X, et al. White matter hyperintensities induce distal deficits in the  
477           connected fibers. *Hum Brain Mapp.* 2021;(December 2020):1-10. doi:10.1002/hbm.25338
- 478   34.   Huo L, Li R, Wang P, Zheng Z, Li J. The default mode network supports episodic  
479           memory in cognitively unimpaired elderly individuals: Different contributions to  
480           immediate recall and delayed recall. *Front Aging Neurosci.* 2018;10(JAN):1-10.  
481           doi:10.3389/fnagi.2018.00006
- 482   35.   Kim H. An integrative model of network activity during episodic memory retrieval and a  
483           meta-analysis of fMRI studies on source memory retrieval. *Brain Res.*  
484           2020;1747(August):147049. doi:10.1016/j.brainres.2020.147049
- 485   36.   Benson G, Hildebrandt A, Lange C, et al. Functional connectivity in cognitive control  
486           networks mitigates the impact of white matter lesions in the elderly. *Alzheimer's Res Ther.*  
487           2018;10(1):1-13. doi:10.1186/s13195-018-0434-3
- 488   37.   He J, Carmichael O, Fletcher E, et al. Influence of functional connectivity and structural  
489           MRI measures on episodic memory. *Neurobiol Aging.* 2012;33(11):2612-2620.  
490           doi:10.1016/j.neurobiolaging.2011.12.029
- 491   38.   Jandric D, Lipp I, Paling D, et al. Concurrent anatomical, physiological and network  
492           changes in cognitively impaired multiple sclerosis patients. *medRxiv.* Published online  
493           2020. doi:<https://doi.org/10.1101/2020.11.20.20235309>
- 494   39.   Foulon C, Cerliani L, Kinkingnehun S, et al. Advanced lesion symptom mapping analyses  
495           and implementation as BCBtoolkit. *Gigascience.* Published online 2018:1-17.  
496           doi:10.1093/gigascience/giy004
- 497   40.   de Schotten MT, Foulon C, Nachev P. Brain disconnections link structural connectivity

498 with function and behaviour. *Nat Commun.* 2020;11(5094). doi:10.1038/s41467-020-  
499 18920-9  
500  
501



502 **Table 1.** Demographic and clinical characteristics of the analyzed study sample (N=52).

|                                       | <b>Mean</b> | <b>SD</b> | <b>Minimum</b> | <b>Maximum</b> |
|---------------------------------------|-------------|-----------|----------------|----------------|
| <b>Age</b>                            | 72.7        | 5.98      | 60             | 84             |
| <b>Education</b>                      | 16.8        | 2.27      | 12             | 20             |
| <b>Gender (M/F)</b>                   | 30/22       | --        | --             | --             |
| <b>Mini Mental Status Examination</b> | 28.71       | 1.07      | 27             | 30             |
| <b>Stroop Interference</b>            | -3.54       | 7.96      | -27.6          | 12.9           |
| <b>TMT B/A Ratio</b>                  | 2.36        | 0.91      | 0.40           | 5.41           |
| <b>Digit Span Total</b>               | 15.0        | 3.34      | 9              | 25             |
| <b>HVLT-R Delayed Recall</b>          | 8.85        | 2.21      | 0              | 12             |

**Table 2.** Spearman rank-order correlations between estimated regional WMH burden (proportion loss of connections) and resting state functional connectivity (RSFC; Fisher r to z transformed) in networks of interest.

| <b>Estimated Regional WMH Burden:</b> | <b>RSFC Cortical VAN</b> | <b>RSFC Cortical FPN</b> | <b>RSFC Cortical DMN</b> | <b>RSFC Cortico-Striatal VAN</b> | <b>RSFC Cortico-Striatal FPN</b> | <b>RSFC Cortico-Striatal DMN</b> |
|---------------------------------------|--------------------------|--------------------------|--------------------------|----------------------------------|----------------------------------|----------------------------------|
| <b>Cortical VAN</b>                   | -.36, p=.009             | -.24, p=.09              | -.29, p=.04              | .09, p=.51                       | -.23, p=.10                      | -.18, p=.21                      |
| <b>Cortical FPN</b>                   | -.25, p=.08              | -.15, p=.30              | -.38, p=.005             | -.11, p=.43                      | -.19, p=.18                      | -.16, p=.27                      |
| <b>Cortical DMN</b>                   | -.30, p=.03              | -.15, p=.30              | -.35, p=.01              | -.13, p=.35                      | -.18, p=.20                      | -.09, p=.55                      |
| <b>Cortico-Striatal VAN</b>           | -.34, p=.01              | -.31, p=.03              | -.33, p=.02              | -.13, p=.35                      | -.27, p=.05                      | -.14, p=.33                      |
| <b>Cortico-Striatal FPN</b>           | -.29, p=.04              | -.11, p=.45              | -.36, p=.008*            | -.14, p=.32                      | -.20, p=.16                      | -.06, p=.66                      |
| <b>Cortico-Striatal DMN</b>           | -.33, p=.02              | -.08, p=.59              | -.27, p=.06              | -.04, p=.76                      | -.13, p=.36                      | -.13, p=.36                      |

Note. VAN = Ventral Attention Network; FPN = Frontoparietal Network; DMN = default mode network. To reduce the probability of a Type I error, we interpret as significant correlations with  $p < .01$ . \*Denotes relationship in which estimated regional WMH burden improved model fit in predicting RSFC beyond age, education, and gender (see Supplement 1).

## Figure Legends

**Figure 1.** Flowchart of neuroimaging analysis procedures and statistical procedures for the primary analyses.

**Figure 2:** Heatmap depicting the distribution of white matter hyperintensities (WMH) in the N=52 participants analyzed in the final sample. The heatmap was created by concatenating all participants' binary lesion masks and thus values range from 0 to 52.

**Figure 3.** Scatterplots (with best fit lines) depicting the relationship between HVLTR Delayed Recall performance predicted by the general linear model, estimated regional white matter hyperintensity burden, and resting state functional connectivity (RSFC) in the (a) cortical default mode network (DMN); (b) cortico-striatal DMN; and (c) cortico-striatal frontoparietal network (FPN). For visualization, estimated regional white matter hyperintensity burden was divided into three equal groups: “low” (blue dots), “moderate” (red dots), and “high” (green dots) burden. RSFC values are normalized to z-scores as in the general linear model.

**Figure 4.** Glassbrains depicting the frontoparietal network (FPN; top left) and default mode network (DMN; top right) as defined by the combined Yeo-Choi atlas and used to calculate the estimated regional white matter hyperintensity burden. Glassbrains also depict functional nodes in the FPN (bottom left) and DMN (bottom right) as defined by the Power atlas and used to calculate resting state functional connectivity.

**List of Supplemental Digital Content:**

Supplemental\_Digital\_Content\_1.docx

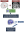

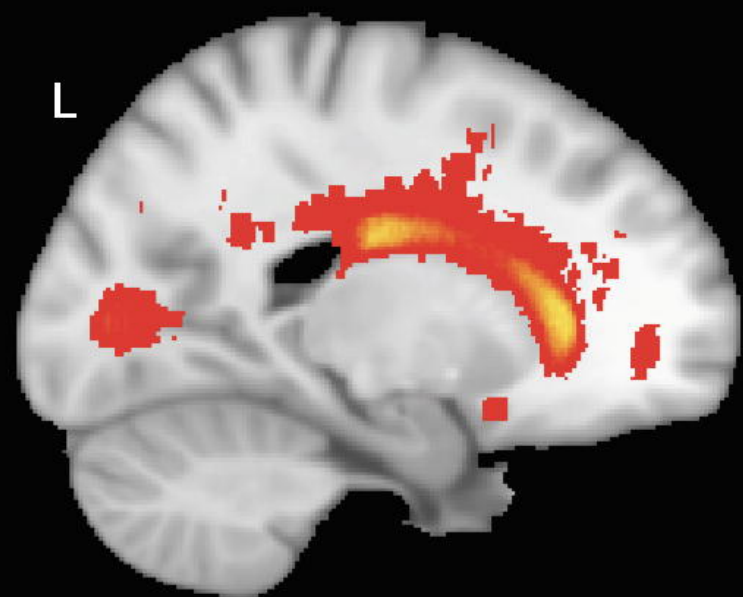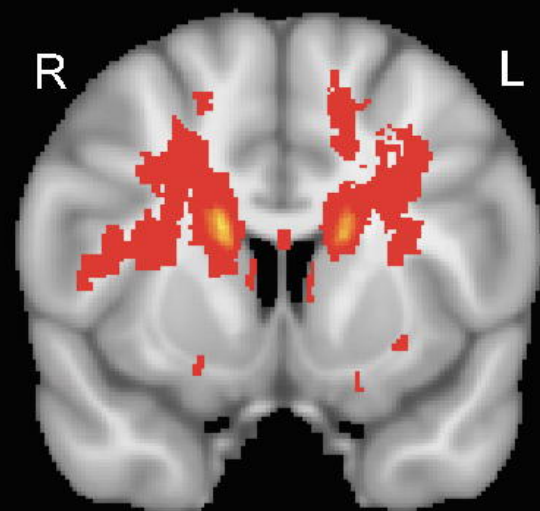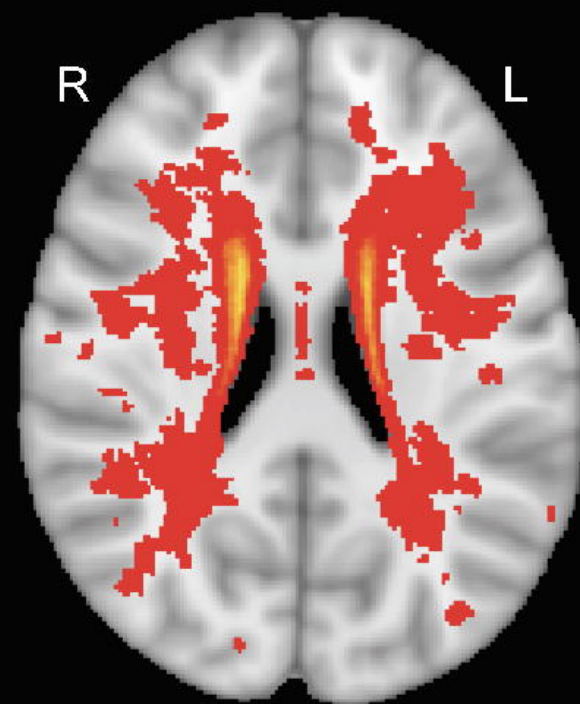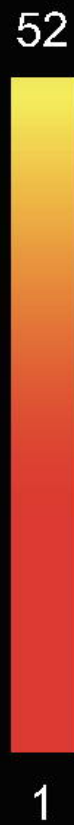

a.

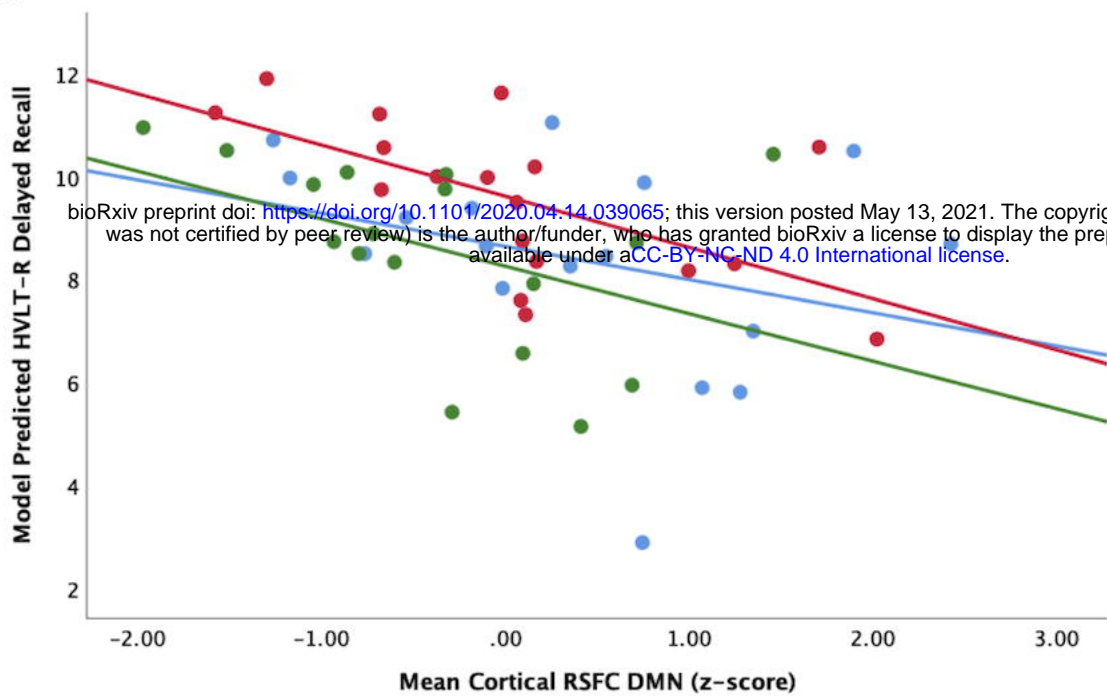

b.

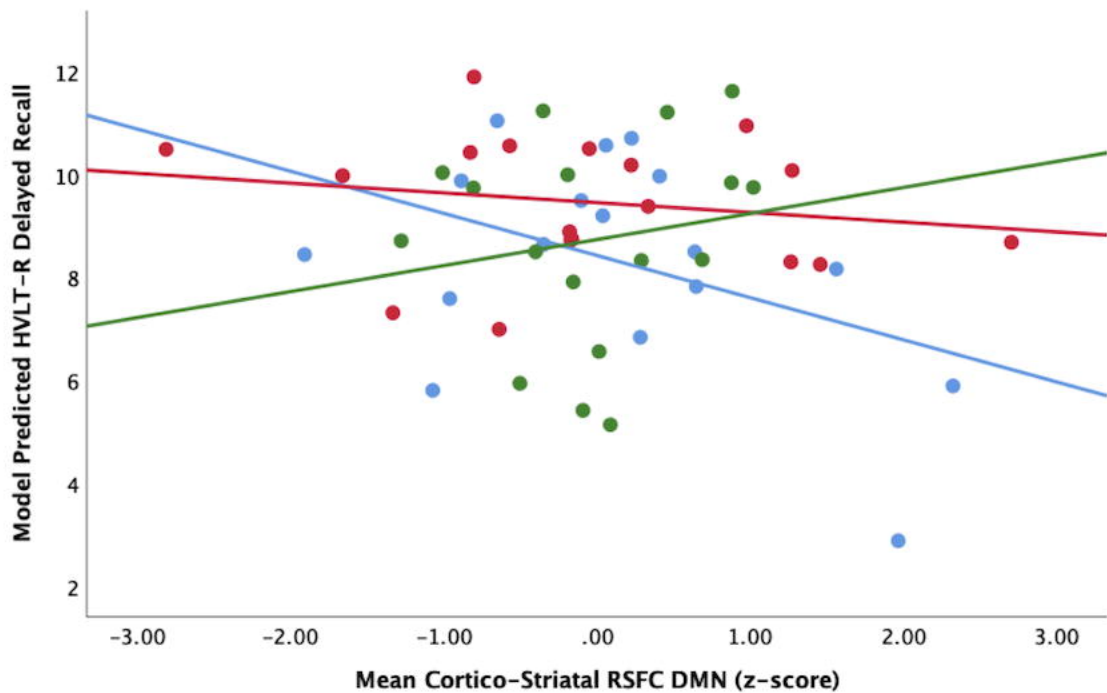

c.

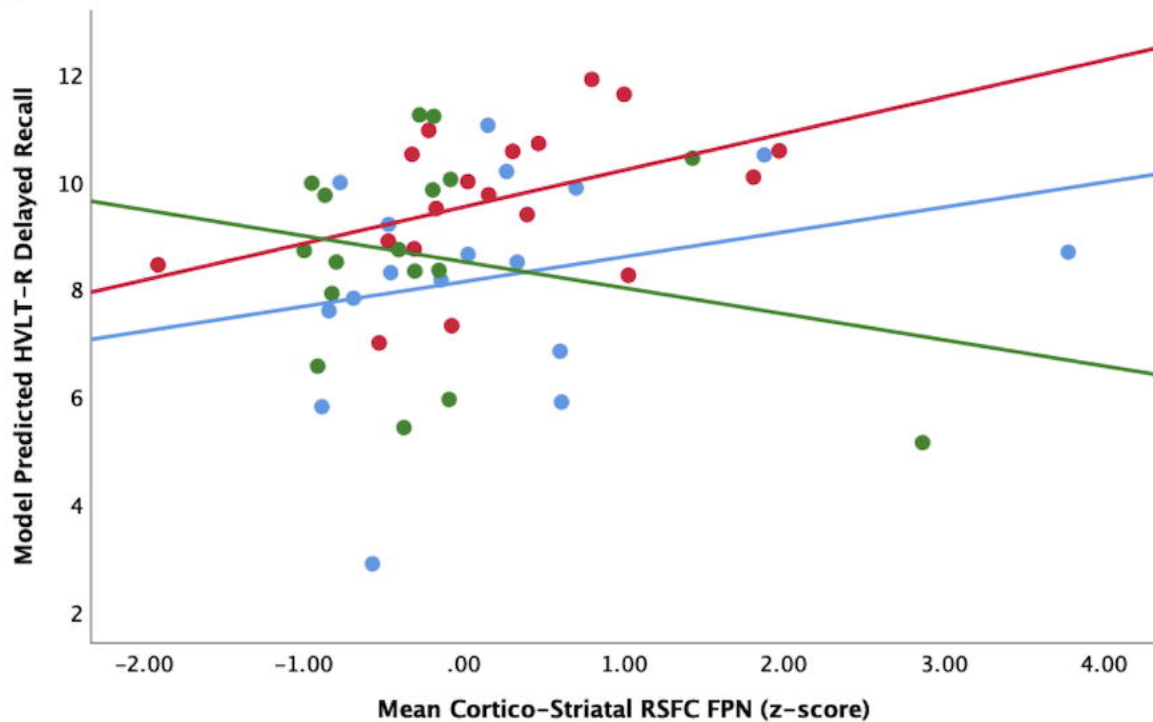

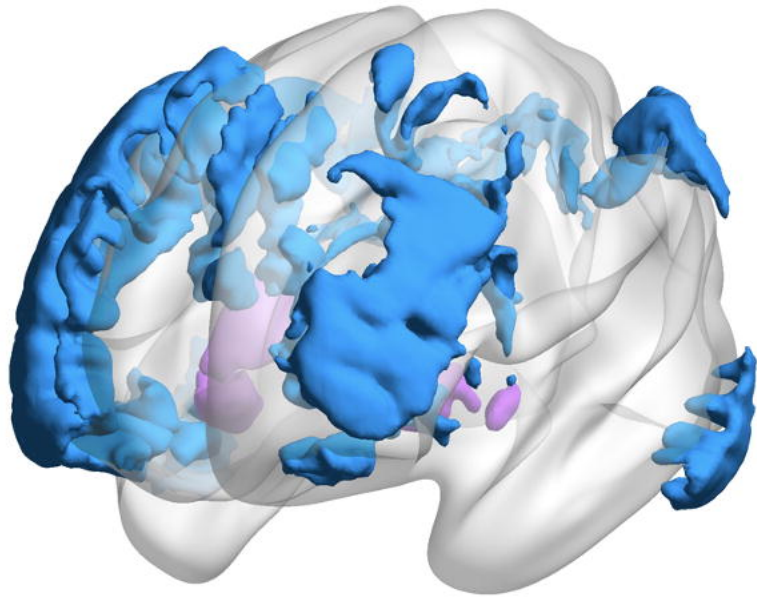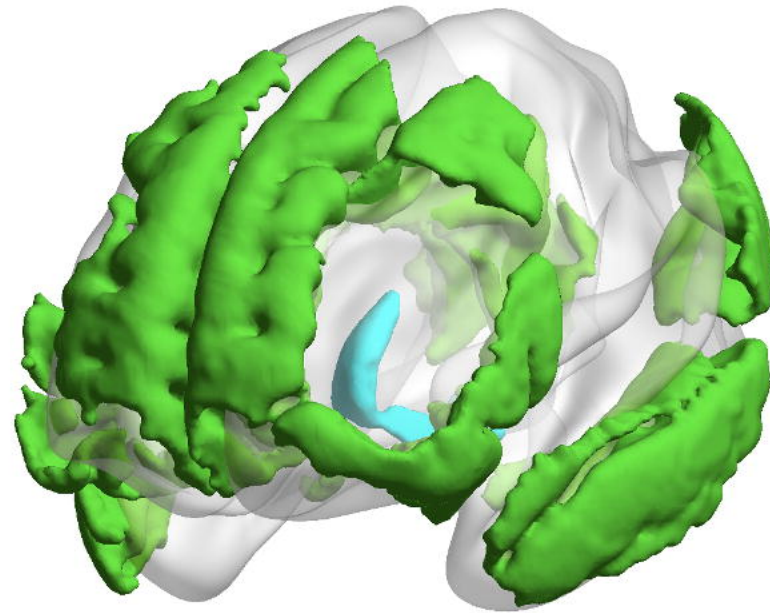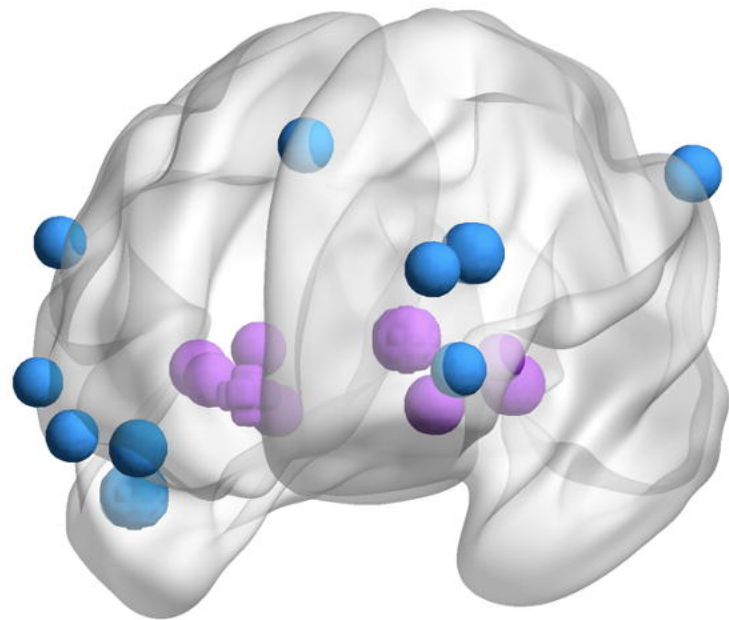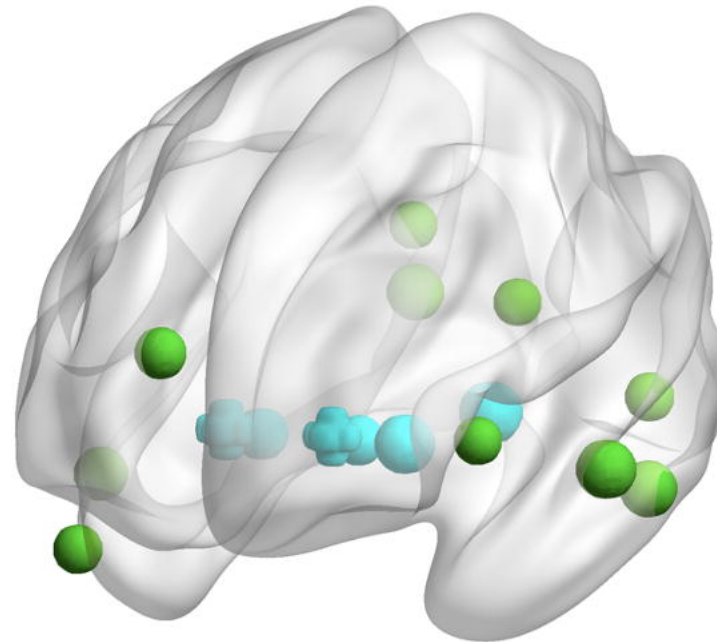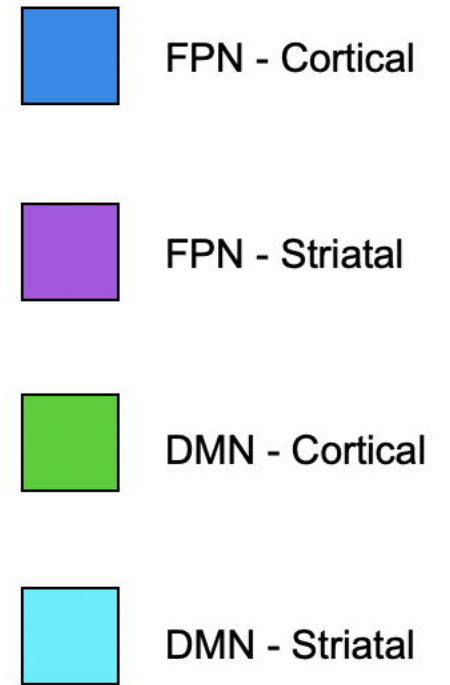

Source: https://www.biorxiv.org/content/biorxiv/early/2021/05/13/2020.04.14.039065.full.pdf
